# Supplementary material for: Genome-Wide Analysis of the TCP Gene Family in Switchgrass (Panicum virgatum L.)
Source: Int J Genomics. 2019 Apr 9;2019:8514928. doi: 10.1155/2019/8514928 (PMC6481156; doi:10.1155/2019/8514928)
Supplement: Supplementary 2 — Table S1: primers used in this study. [file 8514928.f2.xlsx]

## Sheet: Sheet1
Table S1 Primers used in this study
Gene name	Forward primer (5'-3')	Reverse primer (5'-3')
PvTCP1/4	TGACTCGATCCGCCACAGCT	AGCGCTAGGCACCACAGCA
PvTCP2/5	CATGAGCACCAGCGACTC	GGGGTGTCTAGCTAGGAGG
PvTCP3/6	GGATTCTGGGCGCTGC	GTTCAGCGTGCGCTCTC
PvTCP7/9	GGGTTCCAGCACGCAGACA	GGCAAATGGCAGGCATCG
PvTCP8/11	GACGGTGATGATTTCCTG	GCAAGAGAGTAACATCTGGC
PvTCP10	AGCCGGTGCCTGTGGAGTTCCTG	AGCCGGTGCCTGTGGAGTTCCTG
PvTCP12	TCGCCAACTTCCAGCAGC	GGATTTGGGATCTGGAGGG
PvTCP13/40	CGCCGATCATCAGTTCC	CAGCCATGTACCGTACCTG
PvTCP14/16	CAAGCAGGAAAGGAAGACC	GCATATCTTCCTCACGCTG
PvTCP15	CGGCAACGAAGAGGAGG	CCCAATCCGGTGACAGCT
PvTCP17/18	CCACATGGGGATCCTCG	GAGACCTACGAGTCGTCGC
PvTCP19/22	CATCACCAGCAGCAGGAGG	CAGAAGCATCCCGTGGC
PvTCP20/23	AGGAGCAAGGAAGCGAGG	CAGCAGCAGCAGCTAATGG
PvTCP21/24	TACTCCTCGGAAGCTGATC	TGATCGAAGCTTCGTCG
PvTCP25/28	GGCCAGCAAGACCGTCAA	CGTGCTCTTCCATGAGCG
PvTCP26/29	GTCGCACAACAGCAACTCG	GGAGGAGGATTGCGAAAGG
PvTCP27	GAACCACCGAGGAGGCA	GAAAGAATCACCGCTTCGC
PvTCP30/32	GTACCATACTACACTGCGCTC	CTGACAATCTAAGCAACGG
PvTCP31/33	TCAAGTCCGACGGCCAGACCATC	TGCAGGGTCGCCCAGAAC
PvTCP34/35	ATGGACGCCAACATCGG	TGCACCAGCACCAAGCA
PvTCP36/38	TTGGTGGAGTCGTCTTTCA	ATGCGATGACCAAACCA
PvTCP39	TCCTCCTCCTCCCACTACCA	AGGAGCTGTGGCGGATC
PvTCP41/42	CTCGGCTTCTCACCACTGA	GCTCCCAACTTTGCTCCTC
PvUBQ	TTCGTGGTGGCCAGTAAG	AGAGACCAGAAGACCCAGGTACAG
