# Supplementary material for: Genome-Wide Analysis of the TCP Gene Family in Switchgrass (Panicum virgatum L.)
Source: Int J Genomics. 2019 Apr 9;2019:8514928. doi: 10.1155/2019/8514928 (PMC6481156; doi:10.1155/2019/8514928)
Supplement: Supplementary 3 — Table S2: list of TCP members used for phylogenetic relationship analysis. [file 8514928.f3.xlsx]

## Sheet: Sheet1
Table S2 List of TCP members used for phylogenetic relationship analysis
	Panicum virgatum	Oryza sativa	Arabidopsis thaliana
PCF Clade	PvTCP1	OsTCP7	AtTCP21
	PvTCP4	OsTCP17	AtTCP22
	PvTCP39	OsTCP28	AtTCP23
	PvTCP31	OsPCF3	AtTCP8
	PvTCP33	OsPCF1	AtTCP14
	PvTCP3	OsTCP9	AtTCP15
	PvTCP6	OsTCP19	AtTCP9
	PvTCP15	OsTCP6	AtTCP19
	PvTCP27	OsTCP25	AtTCP11
	PvTCP35	OsPCF2	AtTCP16
	PvTCP34		AtTCP6
	PvTCP30		AtTCP7
	PvTCP32		AtTCP20
	PvTCP2
	PvTCP5
	PvTCP17
	PvTCP18
	PvTCP22
	PvTCP19
	PvTCP12
	PvTCP26
	PvTCP29
	PvTCP10
CYC/TB1 Clade	PvTCP36	OsTB1	AtTCP18
	PvTCP38	OsTCP22	AtTCP12
	PvTCP11	OsTCP24	AtTCP1
	PvTCP8
	PvTCP25
	PvTCP28
CIN Clade	PvTCP41	OsPCF5	AtTCP3
	PvTCP42	OsTCP5	AtTCP4
	PvTCP20	OsTCP18	AtTCP10
	PvTCP23	OsPCF8	AtTCP13
	PvTCP21	OsTCP27	AtTCP5
	PvTCP24	OsTCP10	AtTCP17
	PvTCP13	OsPCF6	AtTCP2
	PvTCP40	OsTCP21	AtTCP24
	PvTCP16
	PvTCP14
	PvTCP37
	PvTCP9
	PvTCP7
