# Supplementary material for: Genome-Wide Analysis of the TCP Gene Family in Switchgrass (Panicum virgatum L.)
Source: Int J Genomics. 2019 Apr 9;2019:8514928. doi: 10.1155/2019/8514928 (PMC6481156; doi:10.1155/2019/8514928)
Supplement: Supplementary 4 — Table S3: microarray data of PvTCP genes. [file 8514928.f4.xlsx]

## Sheet: Sheet1
Table S3 Microarray data of PvTCP genes
Probeset	E4_root	E4_crown	E4_node	E4_LFB	E4_LSH	E4i3m	E4i3mVB	E4i4t	E4i4m	E4i4b	Inflo_meristem	Inflo_floret	Inflo_REL	Inflo-PEM	AP13_Seed0dap	AP13_Seed5dap	AP13_Seed10dap	AP13_Seed15dap	AP13_Seed20dap	AP13_Seed25dap	AP13_Seed30dap
PvTCP1/4_at	518.83	1128.5	891.48	153.12	331.61	171.66	227.55	225.64	179.21	1742.73	875.82	438.13	1167	894.69	310.15	253.13	170.89	99.58	76.56	52.28	85.52
PvTCP39_at	122.57	742.74	663.37	77.7	131.2	95.51	108.49	123.89	106.26	1381.29	432.52	204.73	677.8	566.19	108.33	84.94	57.02	49.93	34.73	33.58	45.3
PvTCP31/33_at	48.82	51.85	53.97	50.34	46.87	52.05	45.29	58.57	72.25	143.16	97.62	89.37	61.03	52.24	51.34	48.09	49.64	47.26	44.63	46.68	37.89
PvTCP3/6_at	77.85	58.22	48.75	47.63	45.72	58.19	43.6	53.65	52.14	56.29	48.62	46.4	49.78	47.25	49.15	48.36	43.14	40.93	39.98	50.61	59.04
PvTCP15_at	332.94	188.76	210.09	106.03	213.63	279.73	169.84	195.59	189.49	300.48	541.02	419.74	387.97	307.44	171.6	146.05	98.14	85.19	69.39	51.4	66.97
PvTCP30/32_at	8.66	7.41	8.58	9.22	7.75	8.27	7.49	8.46	8.33	8.96	8.98	8.48	8.07	9.09	8.18	7.96	6.91	7.88	7.55	7.09	7.9
PvTCP27_s_at	277.85	453.51	502.52	47.38	137.93	229.97	163.81	175.06	168	574.8	602.57	540.16	309.46	207.69	79.74	65.29	47.81	35.01	29.87	26.61	35.43
PvTCP34/35_at	69.65	108.56	121.08	19.83	42.23	47.96	37.42	39.84	38.11	120.03	113.95	88.75	89.43	60.72	24.99	21.98	13.85	11.01	10.25	10.65	16.07
PvTCP19/22_at	614.01	378.71	317.33	521.96	586.01	526.49	613.12	379.49	336.29	360.29	479.25	459.05	334.2	363.16	283.63	216.41	239.78	218.29	241.85	307.02	336.15
PvTCP17/18_x_at	311.23	180.12	133.78	147.19	182.14	219.06	234.99	241.08	235.49	255.95	315.33	208.59	249.14	232.46	147.48	138.16	141.48	173.73	157.07	179.43	152.09
PvTCP2/5_at	65.24	26.26	27.81	11.28	17.05	30.78	22.41	30.2	40.37	186.65	51.8	29.38	39.14	26.43	16.14	15.07	14.71	17.1	17.93	14.08	16.01
PvTCP10_at	31.5	34.09	27.08	26.12	25.61	27.69	23.62	23.9	26.16	23	57.31	48.42	36.22	27.23	24.38	23.71	25.54	22.64	24.53	31.27	35.1
PvTCP26/29_at	153.34	159.49	133.55	136.44	137.87	154.7	178.43	151.15	158.41	171.94	330.1	255.73	164.16	158.64	167.9	152.65	169.83	189.89	176.68	209.04	204.85
PvTCP12_at	46.87	49.63	55.56	68.32	47.72	50.83	45.76	51.27	49.29	42.13	57.89	55.49	51.52	47.62	50.34	50.99	60.08	66.61	73.38	84.25	72.75
PvTCP36/38_s_at	14.98	16.52	20.14	18.47	17.1	15.21	15.16	17.87	17.65	22.81	27.11	30.51	16.47	18.89	13.15	12.99	13.47	14.19	15.63	14.1	13.14
PvTCP25/28_at	29.11	39.78	25.21	18.64	15.87	20.75	15.93	22.86	26.4	25.85	39.22	38.02	26.39	25.36	16.2	18.21	27.04	26.32	25.99	22.1	21.69
PvTCP8/11_at	10.6	78.87	29.3	8.97	9.34	9.7	18.4	9.05	10.75	15.33	164.26	265.31	26.88	20.33	7.76	7.63	6.77	7.89	7.78	7.9	7.22
PvTCP7/9_at	22.13	19.05	16.48	18.06	16.62	15.38	13.57	17.66	21.36	19.93	21.59	17.7	14.51	14.86	15.41	14.76	14.25	18.14	18.54	17.31	14.43
PvTCP37_at	60.95	67.37	55.68	70.04	101.28	63.08	103.22	61.79	77.56	44.45	235.33	172.55	187.06	167.99	83.29	109.57	113.79	113.85	87.58	106.41	69.19
PvTCP14/16_at	75.24	18.67	11.87	66.72	27.92	17.94	20.66	24.29	26.6	28.4	96.49	46.79	198.29	231.79	83.71	76.16	68.1	79.86	70.58	63.38	51.18
PvTCP20/23_at	153.04	95.16	104.62	141.89	122.47	140.61	93.95	230.33	337.29	211.76	160.79	115.14	70.4	82.44	80.59	84.27	102.07	93.7	89.37	52.01	45.85
PvTCP13/40_s_at	10.89	14.53	18.2	97.69	31.88	21.74	38.8	38.25	44.47	16.58	815.33	346.04	779.95	659.33	79.62	61.64	55.09	43.59	32.89	24.92	21.47
PvTCP21/24_at	66.11	58.64	20.61	321.87	55.86	25.14	48.09	28.35	30.94	19.27	255.38	175.46	332.57	317.28	108.46	116.11	100.5	103.27	88.07	64.79	44.65
PvTCP41/42_at	19.2	18.17	18.4	19.1	18.22	18.93	17.5	19.73	21.81	19.76	16.88	18.92	16.4	17.13	19.15	17.19	18.11	19.69	18.75	19.03	21.66
